# Supplementary material
Source: PubMed Central journal article supplement (PMC5759033)
Supplement: pr7b00675_si_001.pdf [file pr7b00675_si_001.pdf]

Improved prediction of Bovine Leucocyte Antigens (BoLA) presented ligands by use of mass spectrometry-determined ligand- and in-vitro binding data

Morten Nielsen<sup>1,2,\*</sup>, Tim Connelley<sup>3</sup>, Nicola Ternette<sup>4</sup>

<sup>1</sup> Department of Bio and Health Informatics, Technical University of Denmark, DK-2800 Lyngby, Denmark

<sup>2</sup> Instituto de Investigaciones Biotecnológicas, Universidad Nacional de San Martín, CP1650 San Martín, Argentina

<sup>3</sup> The Roslin Institute, Edinburgh, Midlothian EH25 9RG, UK

<sup>4</sup> The Jenner Institute, Target Discovery Institute Mass Spectrometry Laboratory, Oxford, OX37FZ, UK

### List of supplementary components

**Figure S1:** Predicted length preference for the 6 BoLA molecule included in this study. The solid line shows the length distribution for the MS eluted ligands in both panels and bars shown the length distribution predicted by NetMHCpan-2.8 (2.8 - light grey), NetMHCpan-3.0 (3.0 - white), the eluted ligand output value of NetMHCpan-4.0 (4.0\_EL - black), and the binding affinity output value of NetMHCpan-4.0 (4.0\_BA - grey).

**Table S1:** MS ligands obtained from each of the 5 cell lines analysed.

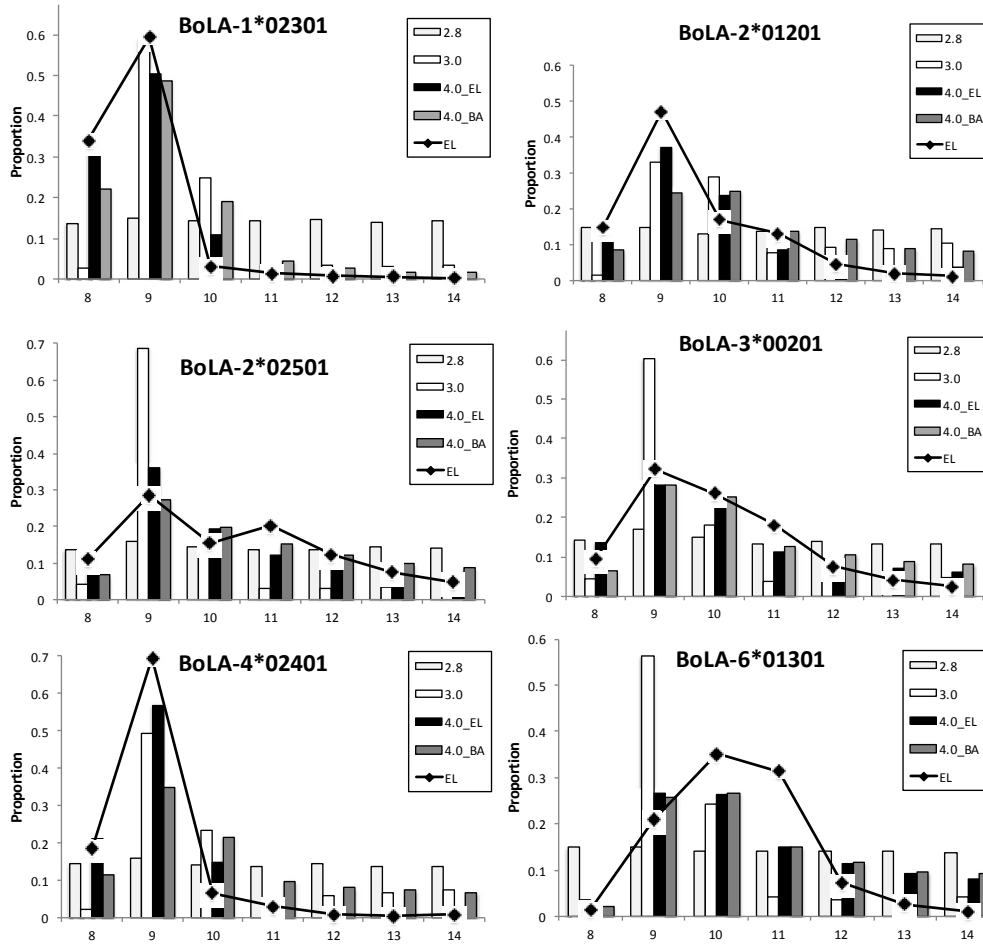

**Supplementary Figure S1.** Predicted length preference for the 6 BoLA molecule included in this study. The solid line show the length distribution for the MS eluted ligands in both panels and bars shown the length distribution predicted by NetMHCpan-2.8 (2.8 - light grey), NetMHCpan-3.0 (3.0 - white), the eluted ligand output value of NetMHCpan-4.0 (4.0\_EL - black), and the binding affinity output value of NetMHCpan-4.0 (4.0\_BA - grey).
